# Supplementary material for: Proposition of classification models for the direct evaluation of the quality of cattle and sheep leathers using laser-induced breakdown spectroscopy (LIBS) analysis
Source: Royal Society of Chemistry journal article supplement (doi:10.1039/c6ra22337k), 2016-01-01
Supplement: c6ra22337k1.pdf [file c6ra22337k1.pdf]

## Supplementary material

### **Proposition of classification models for the direct evaluation of the quality of cattle and sheep leathers using laser-induced breakdown spectroscopy (LIBS) analysis**

Ariane Maciel Neiva<sup>1,2</sup>, Manuel Antonio Chagas Jacinto<sup>2</sup>, Maurício Mello de Alencar<sup>2</sup>, Sérgio Novita Esteves<sup>2</sup>, Edenir Rodrigues Pereira-Filho<sup>1\*</sup>

<sup>1</sup>Grupo de Análise Instrumental Aplicada (GAIA), Departamento de Química, Universidade Federal de São Carlos, São Carlos, São Paulo State, Brazil, Zip code 13565-905

<sup>2</sup>Embrapa Pecuária Sudeste, São Carlos, São Paulo State, Brazil, Zip code 13560-970

\*corresponding author: [erpf@ufscar.br](mailto:erpf@ufscar.br)

Phone: +55 16 3351-8092

Fax: +55 16 3351-8350

## Captions for figures

**Fig. S1** Plot of the average effects *versus* z values for LIBS parameter optimization using full factorial design

**Fig. S2** Leather images after laser pulse

**Fig. S3** Box plot graphics for 10 calculated ratios: 267/357 (1), 267/359 (2), 357/359 (3), 425/427 (4), 267/425 (5), 267/427 (6), 359/425 (7), 357/427 (8), 359/427 (9), 357/425 (10). Circle, box limits, horizontal line, error bars, and squares represents the average, standard deviation, median, 95% of confidence level, and minimum and maximum values, respectively.

**Fig. S4** PC2 scores plot for the leather samples with different colors

**Fig. S5** PC2 loadings plot for the leather samples with different colors

**Fig. S6** PC3 scores plot for the leather samples with different colors

**Fig. S7** PC3 loadings plot for the leather samples with different colors

**Fig. S8** ROC curves for class 1 samples in PLS-DA calibration data set (see test identification in Table 4).

**Fig. S9** ROC curves for class 2 samples in PLS-DA calibration data set (see test identification in Table 4).

**Fig. S10** ROC curves for class 1 samples in PLS-DA validation data set (see test identification in Table 4).

**Fig. S11** ROC curves for class 2 samples in PLS-DA validation data set (see test identification in Table 4).

Fig. S1

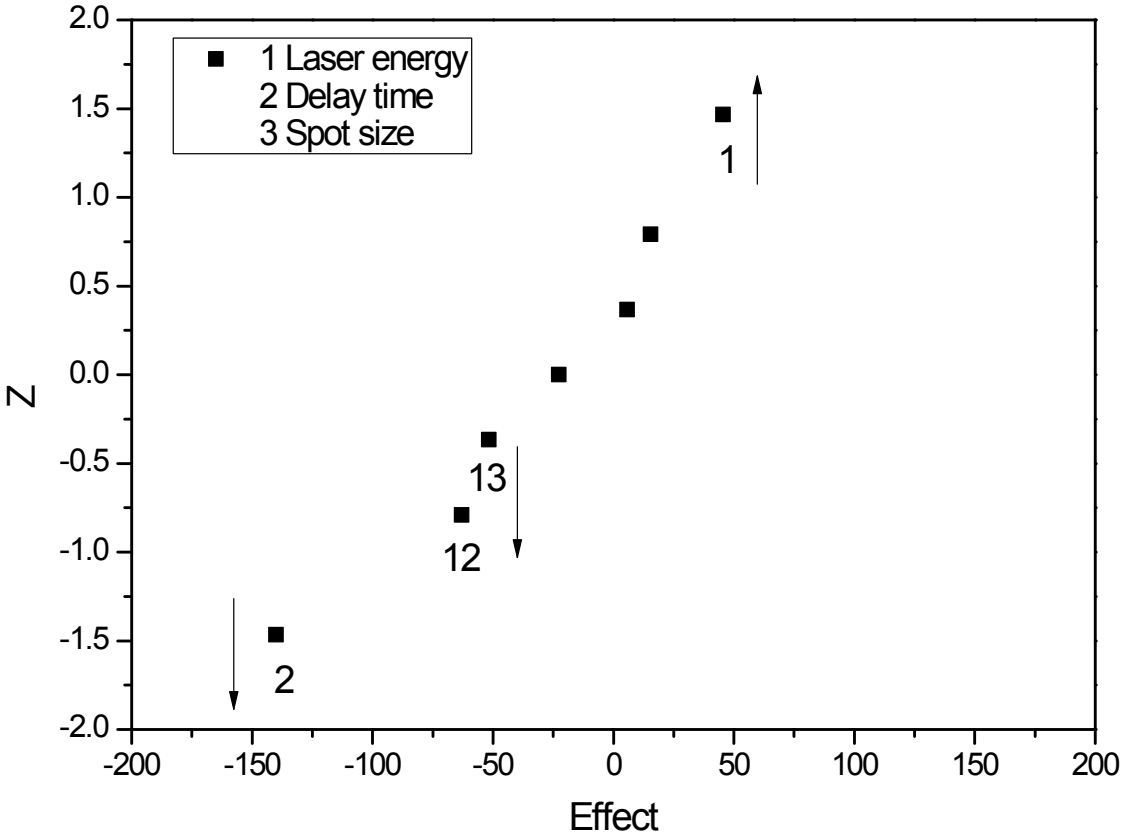

Fig. S2

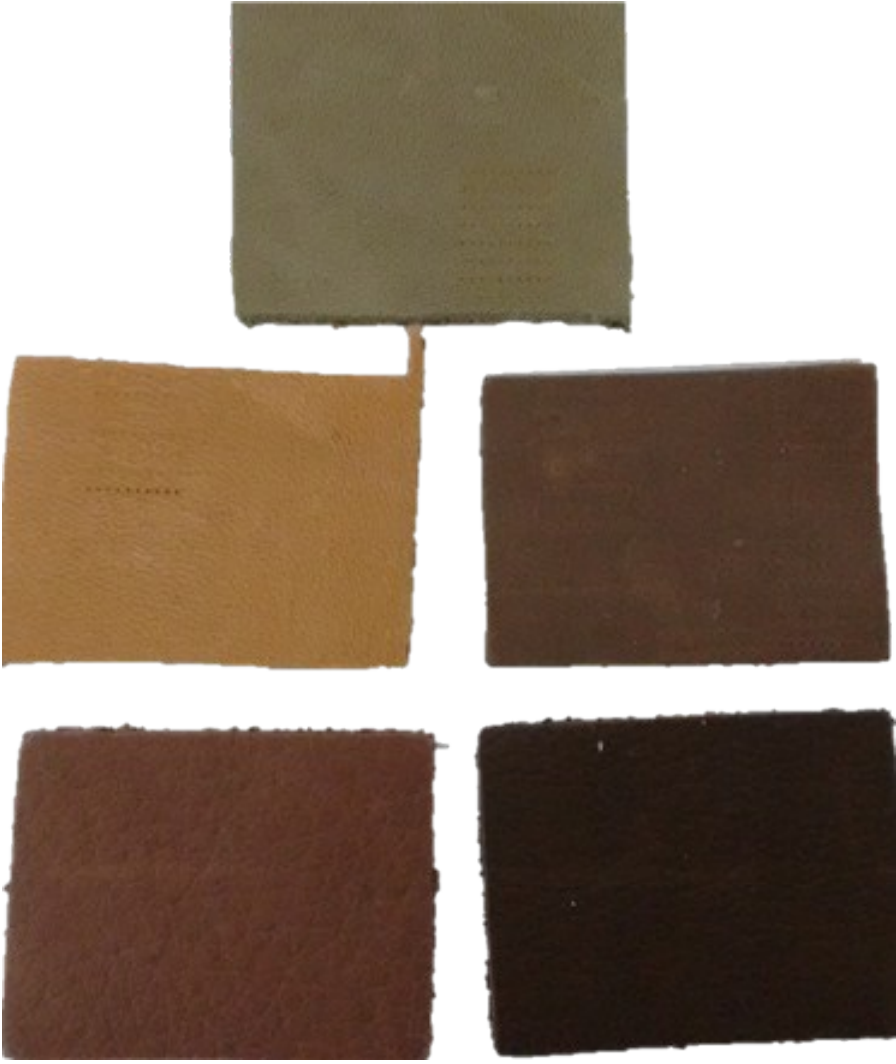

Fig. S3

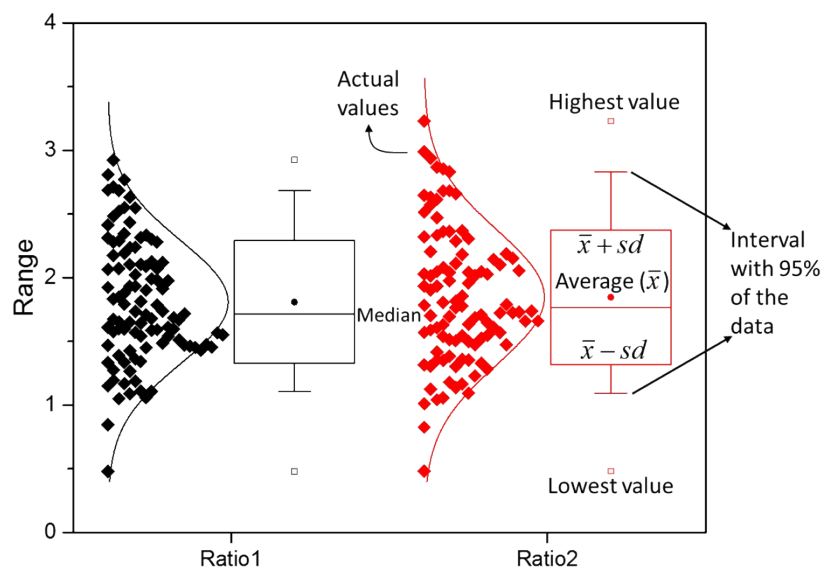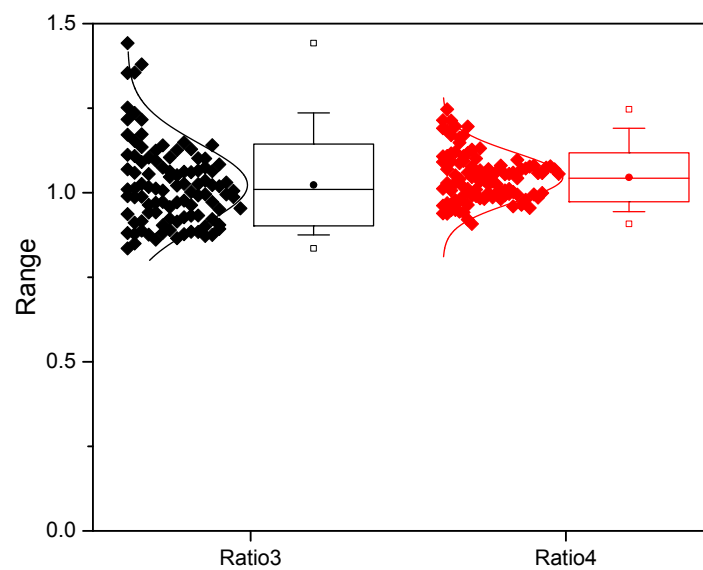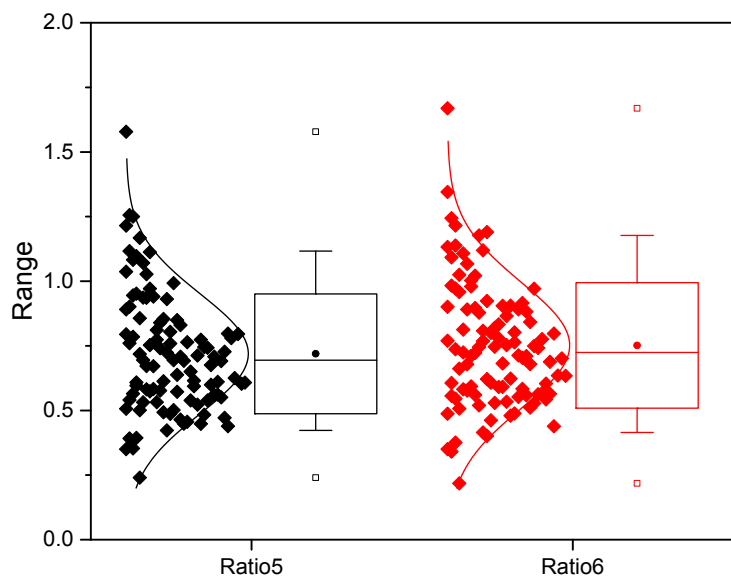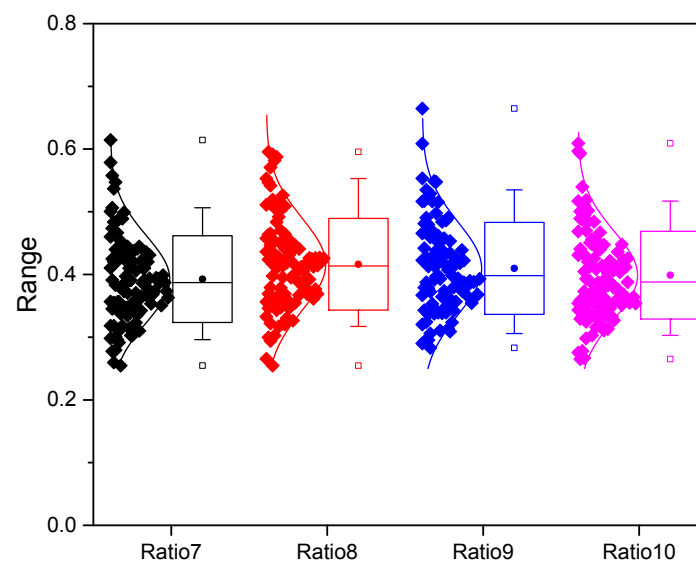

Fig. S4

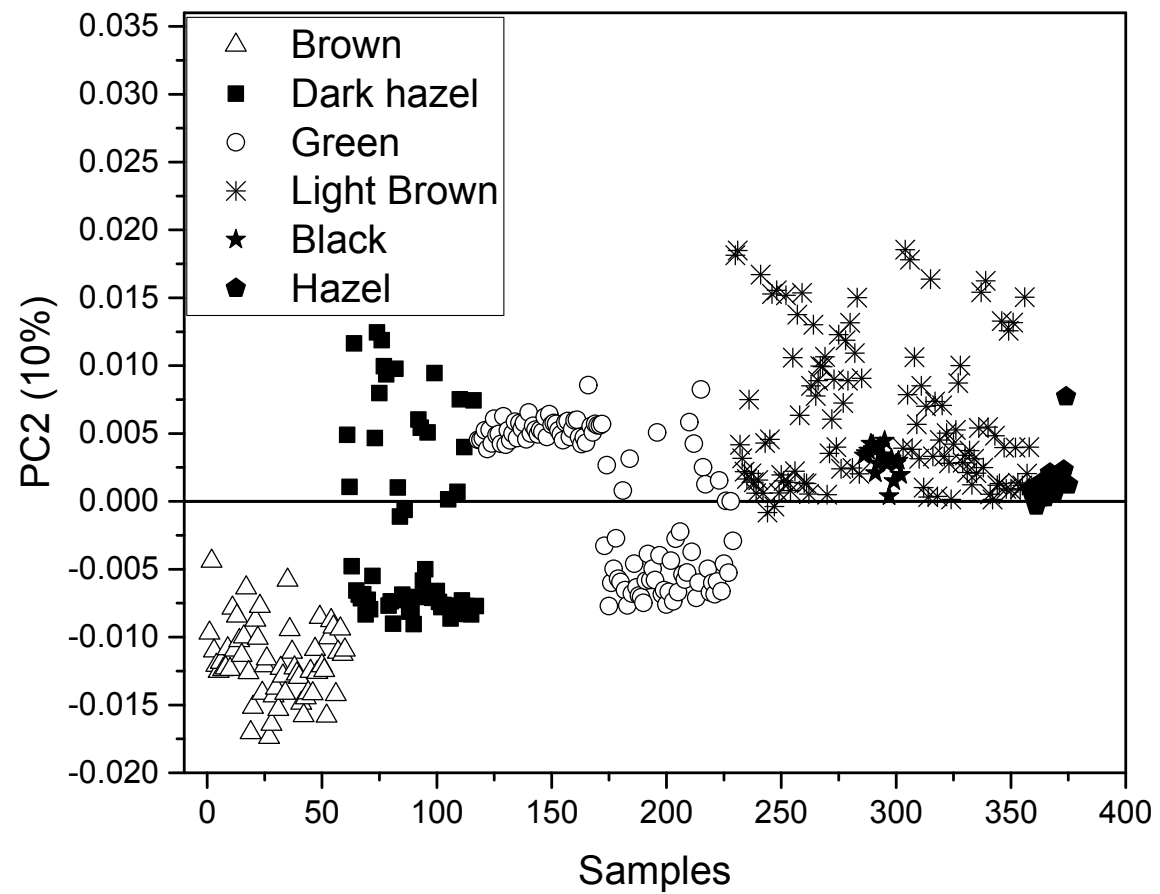

Fig. S5

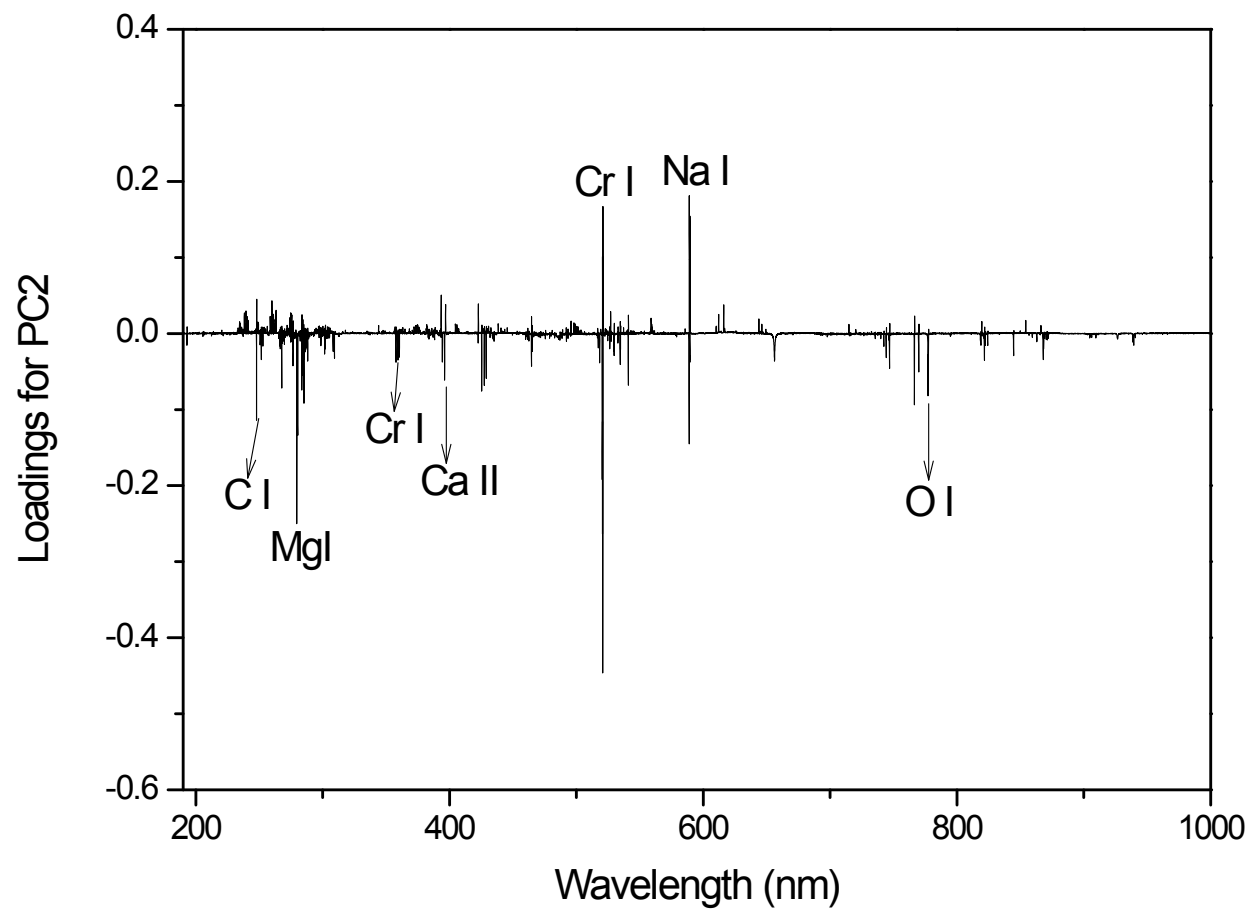



Fig. S6

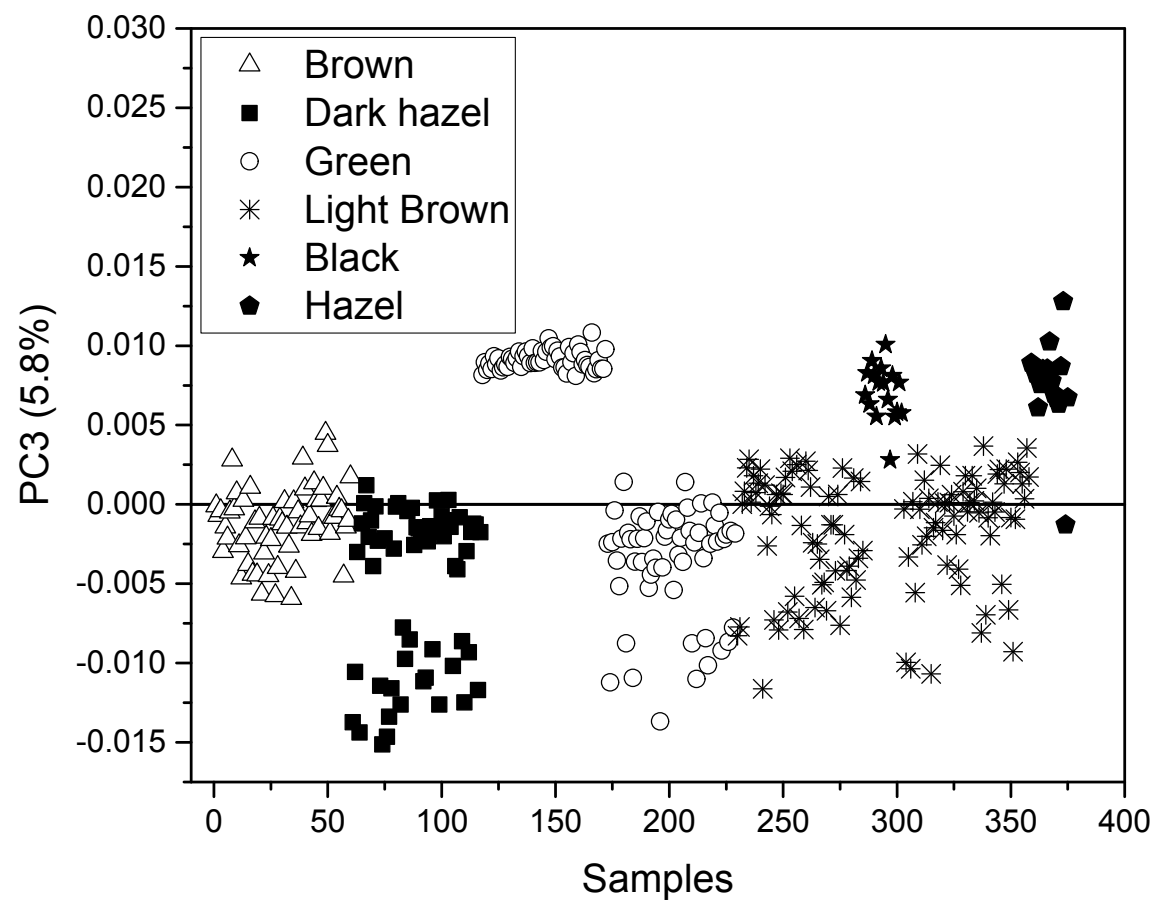

Fig. S7

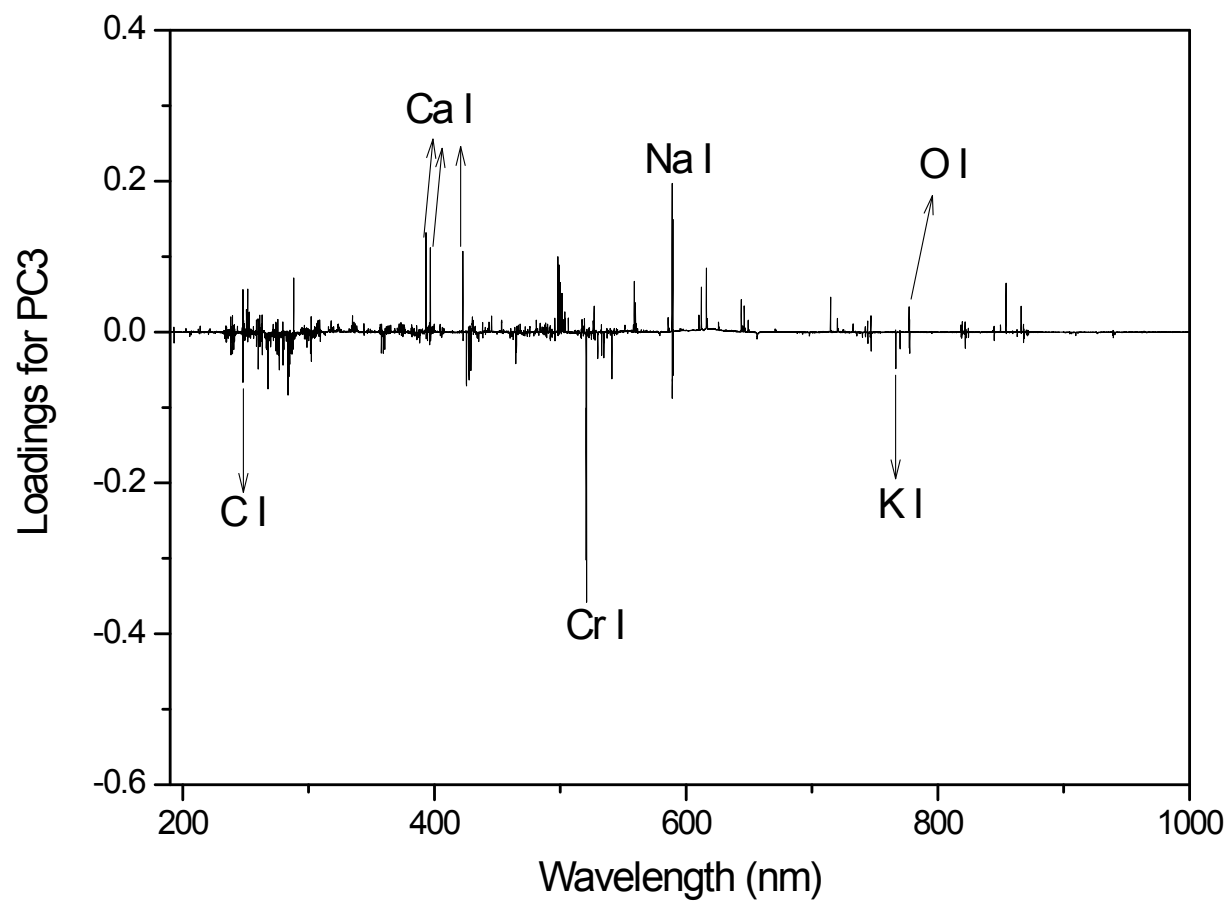

Fig. S8

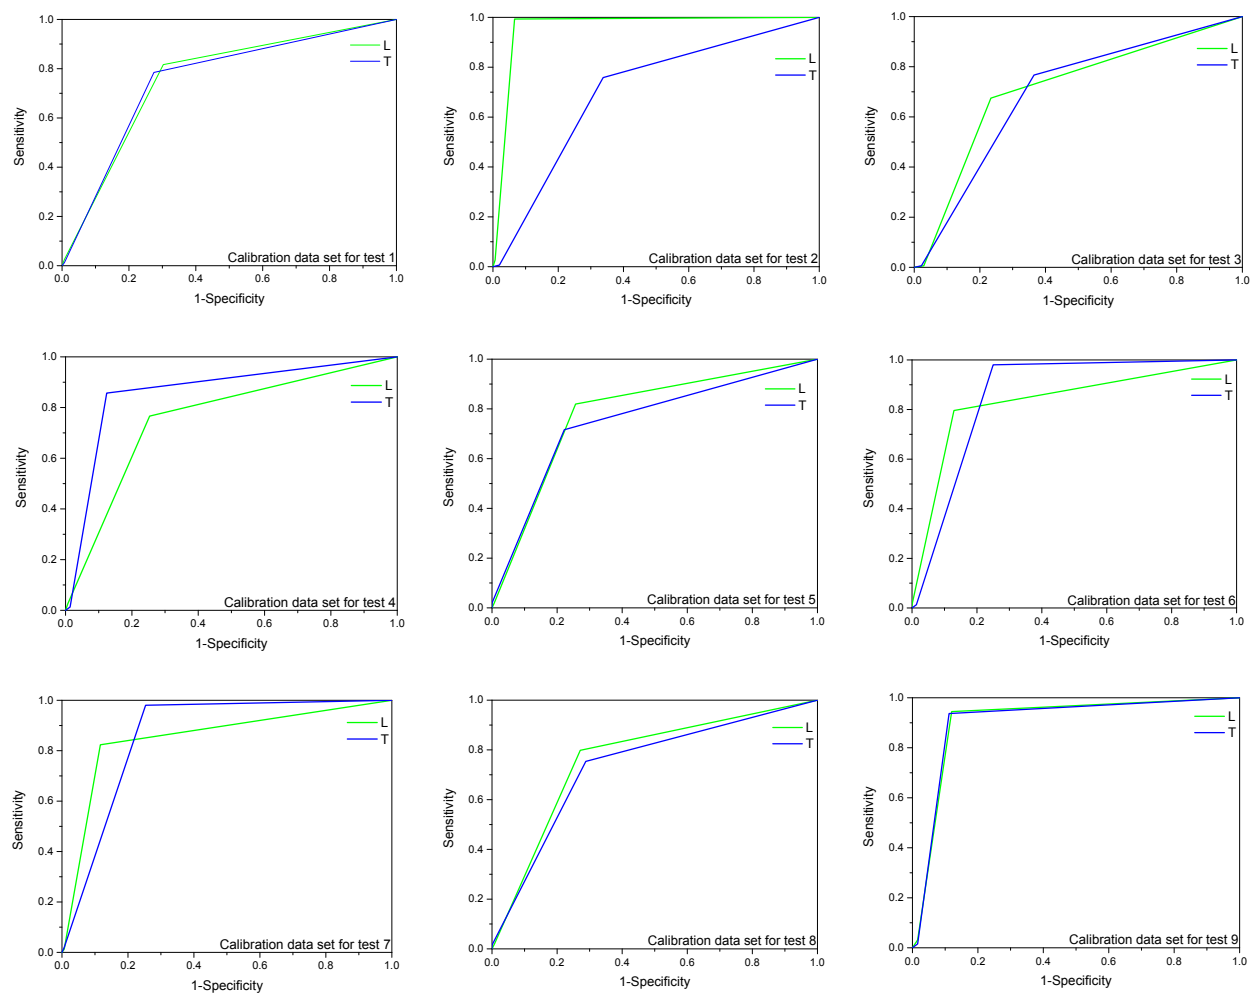

Fig. S9

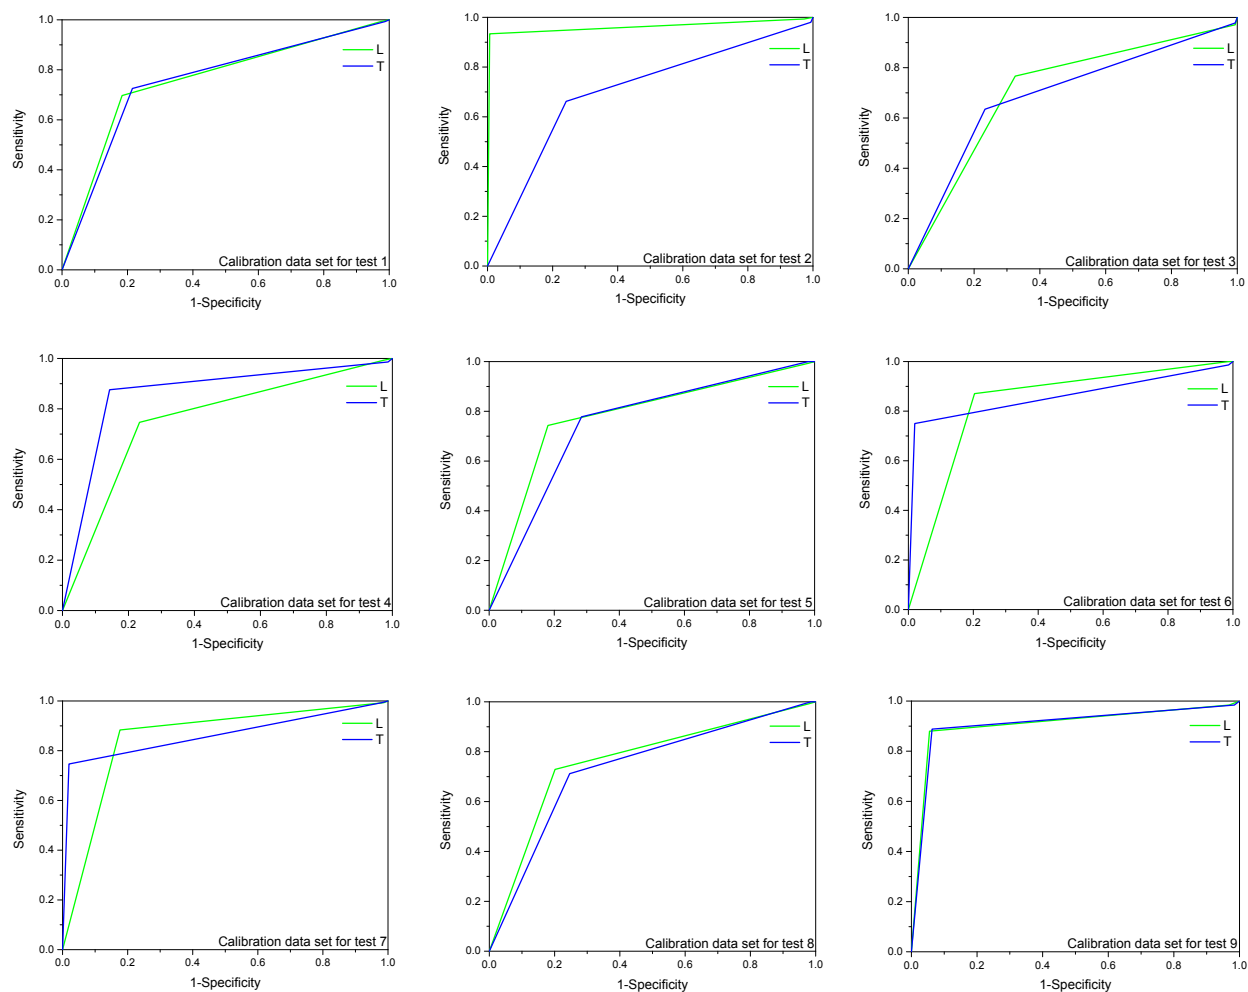

Fig. S10

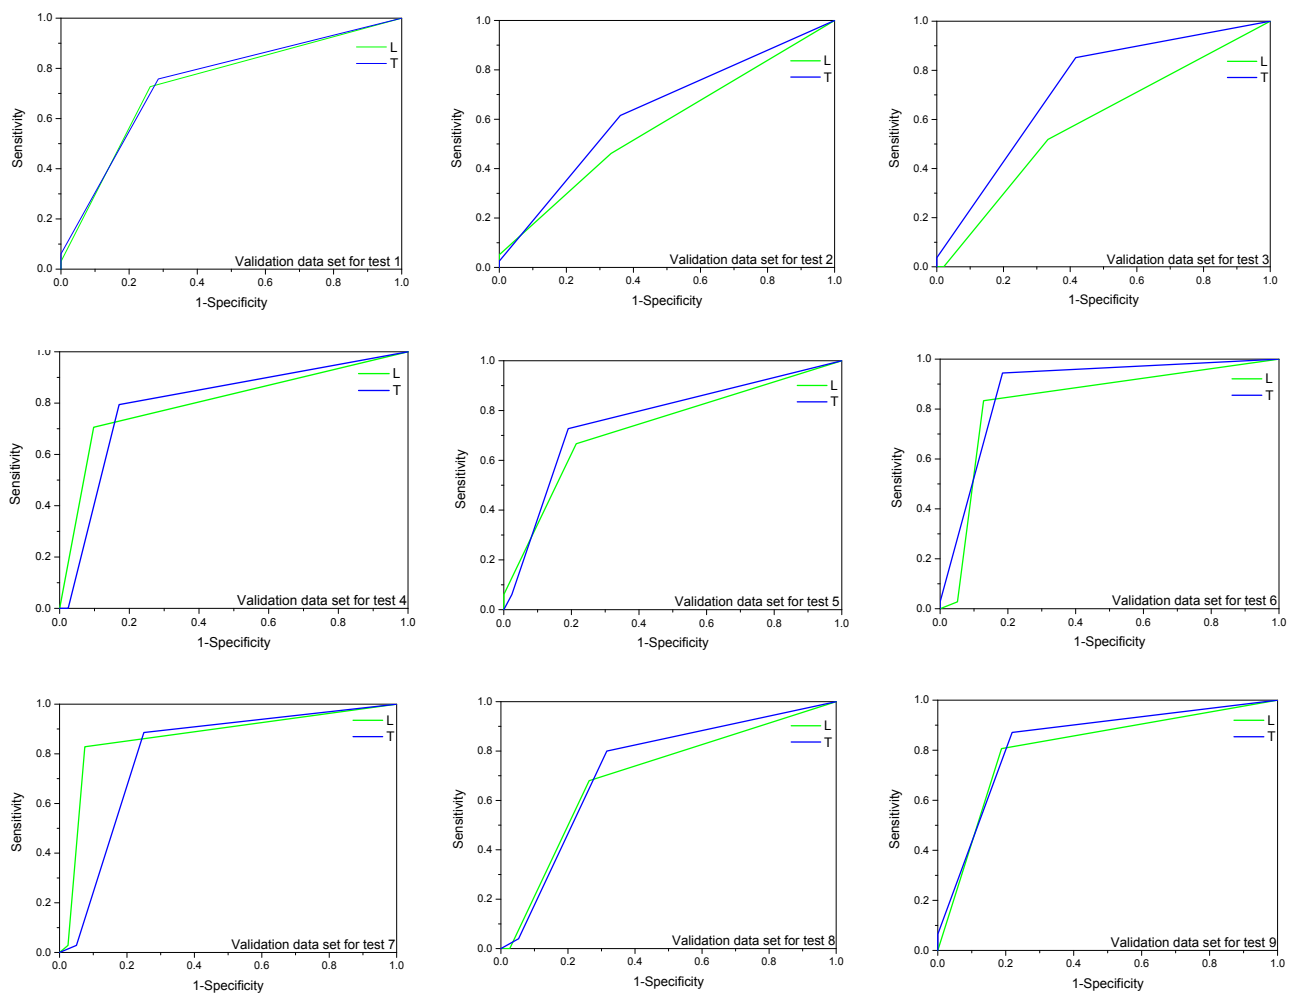

Fig. S11

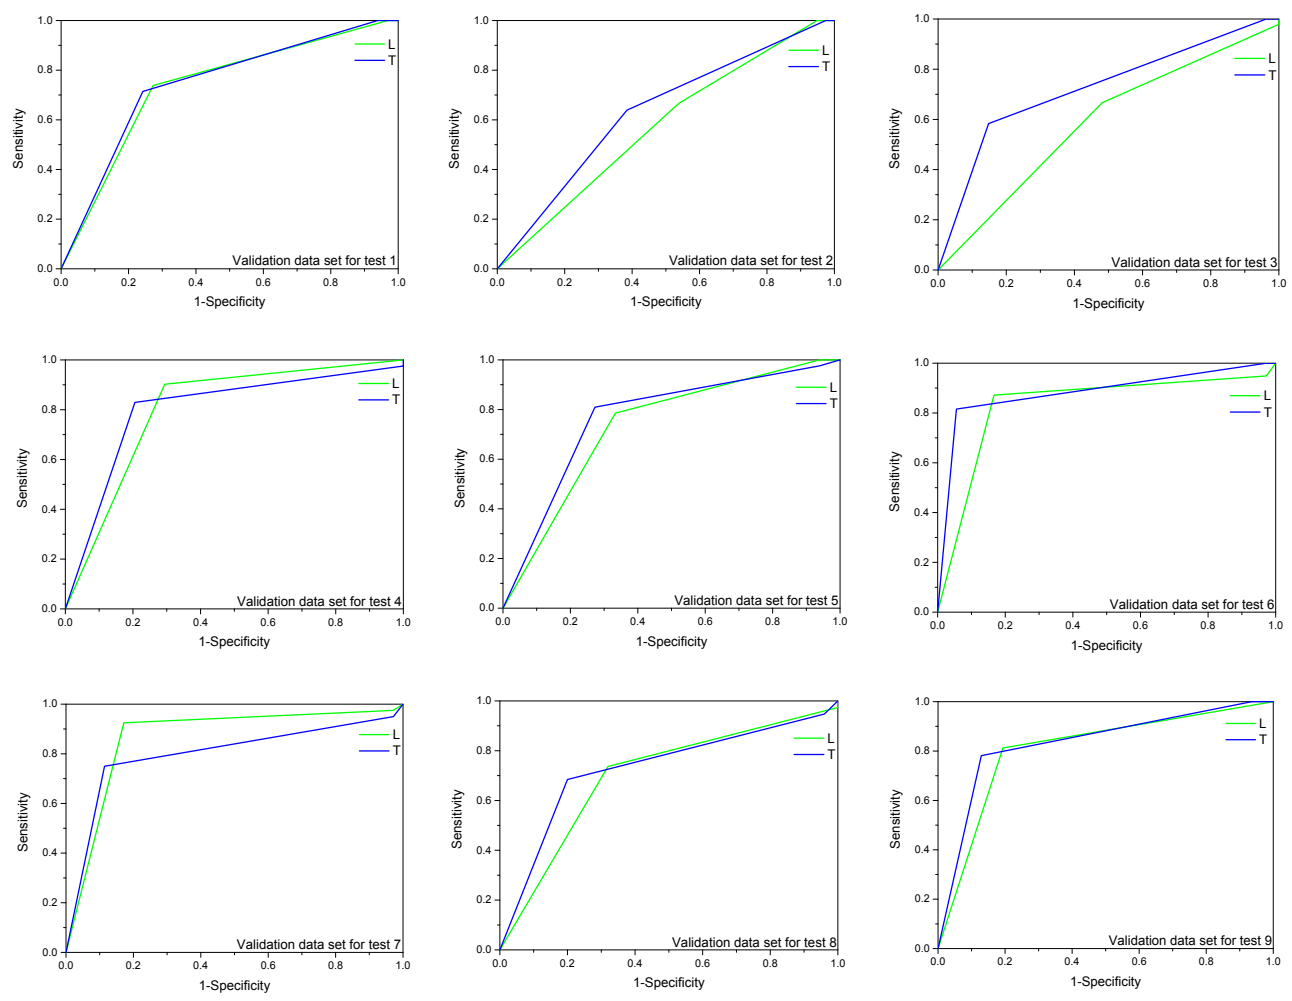

Tables

**Table S1** Number of samples for calibration and validation for KNN, SIMCA and PLS-DA

| Test | Direction | Class 1     | Class 2     | All samples | Class 1    | Class 2    | All samples |
|------|-----------|-------------|-------------|-------------|------------|------------|-------------|
|      |           | Calibration | Calibration | Calibration | Validation | Validation | Validation  |
| 1    | L         | 158         | 142         | 300         | 33         | 42         | 75          |
| 2    | L         | 149         | 151         | 300         | 39         | 36         | 75          |
| 3    | L         | 163         | 137         | 300         | 27         | 48         | 75          |
| 4    | L         | 154         | 146         | 300         | 34         | 41         | 75          |
| 5    | L         | 155         | 144         | 299         | 33         | 42         | 75          |
| 6    | L         | 152         | 147         | 299         | 36         | 39         | 75          |
| 7    | L         | 153         | 146         | 299         | 35         | 40         | 75          |
| 8    | L         | 154         | 118         | 252         | 25         | 38         | 63          |
| 9    | L         | 127         | 125         | 252         | 31         | 32         | 63          |
| 1    | T         | 156         | 144         | 300         | 34         | 41         | 75          |
| 2    | T         | 160         | 140         | 300         | 29         | 46         | 75          |
| 3    | T         | 149         | 151         | 300         | 39         | 36         | 75          |
| 4    | T         | 151         | 148         | 299         | 37         | 38         | 75          |
| 5    | T         | 156         | 143         | 299         | 32         | 43         | 75          |
| 6    | T         | 154         | 146         | 300         | 33         | 41         | 74          |
| 7    | T         | 155         | 144         | 299         | 33         | 42         | 75          |
| 8    | T         | 131         | 121         | 252         | 25         | 38         | 63          |
| 9    | T         | 125         | 127         | 252         | 33         | 30         | 63          |

**Table S2** ANOVA table for calculated model in 359 nm

| Parameter              | Sum of squares | Degree of freedom | Mean square | F    | F tab (95%) |
|------------------------|----------------|-------------------|-------------|------|-------------|
| Regression             | 1.21           | 6                 | 0.201       | 16.9 | 3.58        |
| Residue                | 0.0953         | 8                 | 0.0119      |      |             |
| Total                  | 1.30           | 14                | 0.0931      |      |             |
| Pure error             | 0.0123         | 2                 | 0.00610     | 2.26 | 19.3        |
| Lack of fit            | 0.0831         | 6                 | 0.0138      |      |             |
| R <sup>2</sup>         | 0.927          |                   |             |      |             |
| R <sup>2</sup> maximum | 0.995          |                   |             |      |             |



**Table S3** Accuracy, sensitivity, false alarm rate and specificity obtained for class 1 of SIMCA model

| Test | Direction | Calibration Class 1 |                   |              |                 |                      |                 | Validation Class 1 |              |                 |                      |                 |
|------|-----------|---------------------|-------------------|--------------|-----------------|----------------------|-----------------|--------------------|--------------|-----------------|----------------------|-----------------|
|      |           | Number of samples   | Number of factors | Accuracy (%) | Sensitivity (%) | False alarm rate (%) | Specificity (%) | Number of samples  | Accuracy (%) | Sensitivity (%) | False alarm rate (%) | Specificity (%) |
| 1    | L         | 158                 | 2                 | 70.0         | 61.3            | 19.6                 | 77.8            | 33                 | 61.3         | 59.5            | 36.4                 | 63.6            |
| 2    | L         | 149                 | 2                 | 63.7         | 67.5            | 38.3                 | 59.7            | 39                 | 62.7         | 75.0            | 46.2                 | 51.3            |
| 3    | L         | 163                 | 2                 | 69.7         | 83.2            | 41.1                 | 58.3            | 27                 | 68.0         | 85.4            | 63.0                 | 37.0            |
| 4    | L         | 154                 | 3                 | 77.0         | 70.5            | 14.3                 | 83.1            | 34                 | 74.7         | 75.6            | 26.5                 | 73.5            |
| 5    | L         | 155                 | 2                 | 71.2         | 79.9            | 35.5                 | 63.2            | 33                 | 68.0         | 81.0            | 42.4                 | 51.5            |
| 6    | L         | 152                 | 2                 | 82.9         | 89.1            | 21.7                 | 77.0            | 36                 | 80.0         | 87.2            | 25.0                 | 72.2            |
| 7    | L         | 153                 | 2                 | 83.3         | 89.0            | 20.9                 | 77.8            | 35                 | 82.7         | 92.5            | 25.7                 | 71.4            |
| 8    | L         | 134                 | 2                 | 70.6         | 67.8            | 24.6                 | 73.1            | 25                 | 65.1         | 71.1            | 44.0                 | 56.0            |
| 9    | L         | 127                 | 2                 | 88.5         | 91.2            | 11.0                 | 85.8            | 31                 | 82.5         | 87.5            | 22.6                 | 77.4            |
|      | Average   |                     |                   | 75.2         | 77.7            | 25.2                 | 72.9            |                    | 71.7         | 79.4            | 36.9                 | 61.6            |
|      | Median    |                     |                   | 73.2         | 78.8            | 23.2                 | 75.1            |                    | 69.8         | 80.2            | 36.6                 | 62.6            |
|      | SD        |                     |                   | 8.16         | 11.17           | 10.67                | 10.11           |                    | 8.48         | 10.22           | 13.35                | 13.46           |
| 1    | T         | 156                 | 2                 | 71.0         | 66.7            | 23.7                 | 75.0            | 34                 | 56.0         | 56.1            | 38.2                 | 55.9            |
| 2    | T         | 160                 | 2                 | 74.3         | 69.3            | 20.0                 | 78.8            | 29                 | 76.0         | 67.4            | 6.9                  | 89.7            |
| 3    | T         | 149                 | 2                 | 72.7         | 69.5            | 23.5                 | 75.8            | 39                 | 74.7         | 75.0            | 23.1                 | 74.4            |
| 4    | T         | 151                 | 2                 | 93.8         | 95.3            | 6.4                  | 92.2            | 37                 | 81.3         | 86.8            | 24.3                 | 75.7            |
| 5    | T         | 156                 | 2                 | 73.2         | 83.2            | 34.0                 | 64.1            | 32                 | 65.3         | 74.4            | 43.8                 | 53.1            |
| 6    | T         | 154                 | 2                 | 79.7         | 73.3            | 13.0                 | 85.7            | 33                 | 73.0         | 68.3            | 21.2                 | 78.8            |
| 7    | T         | 155                 | 2                 | 81.6         | 75.0            | 11.0                 | 87.7            | 33                 | 72.0         | 69.0            | 24.2                 | 75.8            |
| 8    | T         | 131                 | 2                 | 72.2         | 63.6            | 18.3                 | 80.2            | 25                 | 69.8         | 63.2            | 16.0                 | 80.0            |
| 9    | T         | 125                 | 2                 | 89.3         | 90.6            | 10.4                 | 88.0            | 33                 | 76.2         | 86.7            | 30.3                 | 66.7            |
|      | Average   |                     |                   | 78.6         | 76.3            | 17.8                 | 80.8            |                    | 71.6         | 71.9            | 25.3                 | 72.2            |
|      | Median    |                     |                   | 76.5         | 74.1            | 18.1                 | 80.5            |                    | 72.5         | 70.5            | 24.3                 | 75.0            |
|      | SD        |                     |                   | 8.18         | 11.01           | 8.58                 | 8.63            |                    | 7.35         | 10.15           | 11.08                | 11.72           |

**Table S4** Accuracy, sensitivity, false alarm rate and specificity obtained for class 2 of SIMCA model

| Test | Direction | Calibration Class 2 |                   |              |                 |                      |                 | Validation Class 2 |              |                 |                      |                 |
|------|-----------|---------------------|-------------------|--------------|-----------------|----------------------|-----------------|--------------------|--------------|-----------------|----------------------|-----------------|
|      |           | Number of samples   | Number of factors | Accuracy (%) | Sensitivity (%) | False alarm rate (%) | Specificity (%) | Number of samples  | Accuracy (%) | Sensitivity (%) | False alarm rate (%) | Specificity (%) |
| 1    | L         | 142                 | 2                 | 70.0         | 77.8            | 38.0                 | 61.3            | 42                 | 61.3         | 63.6            | 40.5                 | 59.5            |
| 2    | L         | 151                 | 2                 | 63.7         | 59.7            | 31.8                 | 67.5            | 36                 | 62.7         | 51.3            | 25.0                 | 75.0            |
| 3    | L         | 137                 | 2                 | 69.7         | 58.3            | 14.6                 | 83.2            | 48                 | 68.0         | 37.0            | 12.5                 | 85.4            |
| 4    | L         | 146                 | 3                 | 77.0         | 83.1            | 28.8                 | 70.5            | 41                 | 74.7         | 73.5            | 24.4                 | 75.6            |
| 5    | L         | 144                 | 2                 | 71.2         | 63.2            | 19.4                 | 79.9            | 42                 | 68.0         | 51.5            | 19.0                 | 81.0            |
| 6    | L         | 147                 | 2                 | 82.9         | 77.0            | 10.9                 | 89.1            | 39                 | 80.0         | 72.2            | 7.7                  | 87.2            |
| 7    | L         | 146                 | 2                 | 83.3         | 77.8            | 10.3                 | 89.0            | 40                 | 82.7         | 71.4            | 5.0                  | 92.5            |
| 8    | L         | 118                 | 2                 | 70.6         | 73.1            | 31.4                 | 67.8            | 38                 | 65.1         | 56.0            | 26.3                 | 71.1            |
| 9    | L         | 125                 | 2                 | 88.5         | 85.8            | 8.0                  | 91.2            | 32                 | 82.5         | 77.4            | 12.5                 | 87.5            |
|      | Average   |                     |                   | 75.2         | 72.9            | 21.5                 | 77.7            |                    | 71.7         | 61.6            | 19.2                 | 79.4            |
|      | Median    |                     |                   | 73.2         | 75.1            | 20.5                 | 78.8            |                    | 69.8         | 62.6            | 19.1                 | 80.2            |
|      | SD        |                     |                   | 8.16         | 10.11           | 11.19                | 11.17           |                    | 8.48         | 13.46           | 11.11                | 10.22           |
| 1    | T         | 144                 | 2                 | 71.0         | 75.0            | 32.6                 | 66.7            | 41                 | 56.0         | 55.9            | 43.9                 | 56.1            |
| 2    | T         | 140                 | 2                 | 74.3         | 78.8            | 29.3                 | 69.3            | 46                 | 76.0         | 89.7            | 32.6                 | 67.4            |
| 3    | T         | 151                 | 2                 | 72.7         | 75.8            | 28.5                 | 69.5            | 36                 | 74.7         | 74.4            | 25.0                 | 75.0            |
| 4    | T         | 148                 | 2                 | 93.8         | 92.2            | 3.4                  | 95.3            | 38                 | 81.3         | 75.7            | 10.5                 | 86.8            |
| 5    | T         | 143                 | 2                 | 73.2         | 64.1            | 16.8                 | 83.2            | 43                 | 65.3         | 53.1            | 23.3                 | 74.4            |
| 6    | T         | 146                 | 2                 | 79.7         | 85.7            | 25.3                 | 73.3            | 41                 | 73.0         | 78.8            | 29.3                 | 68.3            |
| 7    | T         | 144                 | 2                 | 81.6         | 87.7            | 24.3                 | 75.0            | 42                 | 72.0         | 75.8            | 26.2                 | 69.0            |
| 8    | T         | 121                 | 2                 | 72.2         | 80.2            | 36.4                 | 63.6            | 38                 | 69.8         | 80.0            | 31.6                 | 63.2            |
| 9    | T         | 127                 | 2                 | 89.3         | 88.0            | 7.9                  | 90.6            | 30                 | 76.2         | 66.7            | 13.3                 | 86.7            |
|      | Average   |                     |                   | 78.6         | 80.8            | 22.7                 | 76.3            |                    | 71.6         | 72.2            | 26.2                 | 71.9            |
|      | Median    |                     |                   | 76.5         | 80.5            | 24.8                 | 74.1            |                    | 72.5         | 75.0            | 26.2                 | 70.5            |
|      | SD        |                     |                   | 8.18         | 8.63            | 11.18                | 11.01           |                    | 7.35         | 11.72           | 10.09                | 10.15           |

**Table S5** Accuracy, sensitivity, false alarm rate and specificity obtained for class 1 of PLS-DA model

| Test | Direction | Calibration Class 1 |                   |              |                 |                      |                 | Validation Class 1 |              |                 |                      |                 |
|------|-----------|---------------------|-------------------|--------------|-----------------|----------------------|-----------------|--------------------|--------------|-----------------|----------------------|-----------------|
|      |           | Number of samples   | Number of factors | Accuracy (%) | Sensitivity (%) | False alarm rate (%) | Specificity (%) | Number of samples  | Accuracy (%) | Sensitivity (%) | False alarm rate (%) | Specificity (%) |
| 1    | L         | 158                 | 3                 | 74.7         | 69.7            | 18.4                 | 79.1            | 33                 | 72.0         | 71.4            | 24.2                 | 72.7            |
| 2    | L         | 149                 | 3                 | 95.0         | 93.4            | 0.7                  | 96.6            | 39                 | 53.3         | 66.7            | 53.8                 | 41.0            |
| 3    | L         | 163                 | 3                 | 71.3         | 76.6            | 32.5                 | 66.9            | 27                 | 61.3         | 66.7            | 48.1                 | 51.9            |
| 4    | L         | 154                 | 3                 | 74.3         | 74.7            | 23.4                 | 74.0            | 34                 | 81.3         | 90.2            | 29.4                 | 70.6            |
| 5    | L         | 155                 | 3                 | 77.3         | 74.3            | 18.1                 | 80.0            | 33                 | 70.7         | 78.6            | 33.3                 | 60.6            |
| 6    | L         | 152                 | 3                 | 82.6         | 87.1            | 20.4                 | 78.3            | 36                 | 84.0         | 87.2            | 16.7                 | 80.6            |
| 7    | L         | 153                 | 3                 | 84.6         | 88.4            | 17.6                 | 81.0            | 35                 | 86.7         | 92.5            | 17.1                 | 80.0            |
| 8    | L         | 134                 | 3                 | 75.4         | 72.9            | 20.1                 | 77.6            | 25                 | 71.4         | 73.7            | 32.0                 | 68.0            |
| 9    | L         | 127                 | 2                 | 89.7         | 88.0            | 5.5                  | 91.3            | 31                 | 90.5         | 87.5            | 6.5                  | 93.5            |
|      | Average   |                     |                   | 80.5         | 80.6            | 17.4                 | 80.5            |                    | 74.6         | 79.4            | 29.0                 | 68.8            |
|      | Median    |                     |                   | 78.9         | 78.6            | 18.2                 | 79.6            |                    | 73.3         | 79.0            | 29.2                 | 69.7            |
|      | SD        |                     |                   | 7.97         | 8.58            | 9.38                 | 8.81            |                    | 12.21        | 10.23           | 15.15                | 15.89           |
| 1    | T         | 156                 | 3                 | 74.3         | 71.5            | 21.8                 | 76.9            | 34                 | 72.0         | 73.2            | 23.5                 | 70.6            |
| 2    | T         | 160                 | 3                 | 71.3         | 68.6            | 25.0                 | 73.8            | 29                 | 80.0         | 71.7            | 3.4                  | 93.1            |
| 3    | T         | 149                 | 3                 | 71.7         | 63.6            | 19.5                 | 79.9            | 39                 | 76.0         | 72.2            | 17.9                 | 79.5            |
| 4    | T         | 151                 | 3                 | 89.6         | 90.5            | 9.9                  | 88.7            | 37                 | 82.7         | 86.8            | 21.6                 | 78.4            |
| 5    | T         | 156                 | 3                 | 84.4         | 78.3            | 12.4                 | 86.8            | 32                 | 73.3         | 79.1            | 28.1                 | 65.6            |
| 6    | T         | 154                 | 3                 | 82.7         | 71.9            | 5.8                  | 92.9            | 33                 | 78.4         | 75.6            | 15.2                 | 81.8            |
| 7    | T         | 155                 | 3                 | 83.9         | 72.9            | 4.5                  | 94.2            | 33                 | 74.7         | 71.4            | 18.2                 | 78.8            |
| 8    | T         | 131                 | 3                 | 72.2         | 70.2            | 24.4                 | 74.0            | 25                 | 68.3         | 65.8            | 24.0                 | 72.0            |
| 9    | T         | 125                 | 2                 | 89.7         | 87.4            | 6.4                  | 92.0            | 33                 | 85.7         | 86.7            | 6.1                  | 84.8            |
|      | Average   |                     |                   | 80.0         | 75.0            | 14.4                 | 84.4            |                    | 76.8         | 75.8            | 17.6                 | 78.3            |
|      | Median    |                     |                   | 81.3         | 72.4            | 13.4                 | 85.6            |                    | 76.4         | 74.4            | 18.1                 | 78.6            |
|      | SD        |                     |                   | 7.63         | 8.85            | 8.31                 | 8.27            |                    | 5.48         | 7.13            | 8.24                 | 8.18            |

**Table S6** Accuracy, sensitivity, false alarm rate and specificity obtained for class 2 of PLS-DA model

| Test | Direction | Calibration Class 2 |                   |              |                 |                      |                 | Validation Class 2 |              |                 |                      |                 |
|------|-----------|---------------------|-------------------|--------------|-----------------|----------------------|-----------------|--------------------|--------------|-----------------|----------------------|-----------------|
|      |           | Number of samples   | Number of factors | Accuracy (%) | Sensitivity (%) | False alarm rate (%) | Specificity (%) | Number of samples  | Accuracy (%) | Sensitivity (%) | False alarm rate (%) | Specificity (%) |
| 1    | L         | 142                 | 3                 | 74.7         | 79.1            | 29.6                 | 69.7            | 42                 | 72.0         | 72.7            | 28.6                 | 71.4            |
| 2    | L         | 151                 | 3                 | 95.0         | 96.6            | 6.0                  | 93.4            | 36                 | 53.3         | 41.0            | 33.3                 | 66.7            |
| 3    | L         | 137                 | 3                 | 71.3         | 66.9            | 20.4                 | 76.6            | 48                 | 61.3         | 51.9            | 31.3                 | 66.7            |
| 4    | L         | 146                 | 3                 | 74.3         | 74.0            | 24.7                 | 74.7            | 41                 | 81.3         | 70.6            | 9.8                  | 90.2            |
| 5    | L         | 144                 | 3                 | 77.3         | 80.0            | 25.0                 | 74.3            | 42                 | 70.7         | 60.6            | 21.4                 | 78.6            |
| 6    | L         | 147                 | 3                 | 82.6         | 78.3            | 12.9                 | 87.1            | 39                 | 84.0         | 80.6            | 7.7                  | 87.2            |
| 7    | L         | 146                 | 3                 | 84.6         | 81.0            | 11.0                 | 88.4            | 40                 | 86.7         | 80.0            | 5.0                  | 92.5            |
| 8    | L         | 118                 | 3                 | 75.4         | 77.6            | 26.3                 | 72.9            | 38                 | 71.4         | 68.0            | 23.7                 | 73.7            |
| 9    | L         | 125                 | 2                 | 89.7         | 91.3            | 10.4                 | 88.0            | 32                 | 90.5         | 93.5            | 12.5                 | 87.5            |
|      | Average   |                     |                   | 80.5         | 80.5            | 18.5                 | 80.6            |                    | 74.6         | 68.8            | 19.2                 | 79.4            |
|      | Median    |                     |                   | 78.9         | 79.6            | 19.5                 | 78.6            |                    | 73.3         | 69.7            | 20.3                 | 79.0            |
|      | SD        |                     |                   | 7.97         | 8.81            | 8.50                 | 8.58            |                    | 12.21        | 15.89           | 10.76                | 10.23           |
| 1    | T         | 144                 | 3                 | 74.3         | 76.9            | 27.8                 | 71.5            | 41                 | 72.0         | 70.6            | 26.8                 | 73.2            |
| 2    | T         | 140                 | 3                 | 71.3         | 73.8            | 30.0                 | 68.6            | 46                 | 80.0         | 93.1            | 28.3                 | 71.7            |
| 3    | T         | 151                 | 3                 | 71.7         | 79.9            | 34.4                 | 63.6            | 36                 | 76.0         | 79.5            | 27.8                 | 72.2            |
| 4    | T         | 148                 | 3                 | 89.6         | 88.7            | 8.1                  | 90.5            | 38                 | 82.7         | 78.4            | 10.5                 | 86.8            |
| 5    | T         | 143                 | 3                 | 84.4         | 86.8            | 21.7                 | 78.3            | 43                 | 73.3         | 65.6            | 18.6                 | 79.1            |
| 6    | T         | 146                 | 3                 | 82.7         | 92.9            | 26.7                 | 71.9            | 41                 | 78.4         | 81.8            | 19.5                 | 75.6            |
| 7    | T         | 144                 | 3                 | 83.9         | 94.2            | 25.7                 | 72.9            | 42                 | 74.7         | 78.8            | 23.8                 | 71.4            |
| 8    | T         | 121                 | 3                 | 72.2         | 74.0            | 29.8                 | 70.2            | 38                 | 68.3         | 72.0            | 28.9                 | 65.8            |
| 9    | T         | 127                 | 2                 | 89.7         | 92.0            | 11.0                 | 87.4            | 30                 | 85.7         | 84.8            | 13.3                 | 86.7            |
|      | Average   |                     |                   | 80.0         | 84.4            | 23.9                 | 75.0            |                    | 76.8         | 78.3            | 22.0                 | 75.8            |
|      | Median    |                     |                   | 81.3         | 85.6            | 26.2                 | 72.4            |                    | 76.4         | 78.6            | 22.9                 | 74.4            |
|      | SD        |                     |                   | 7.63         | 8.27            | 8.87                 | 8.85            |                    | 5.48         | 8.18            | 6.82                 | 7.13            |
